# Supplementary material for: Temporal Sensory Profiles of Regular and Sodium-Reduced Foods Elicited by Temporal Dominance of Sensations (TDS) and Temporal Check-All-That-Apply (TCATA)
Source: MDPI journal article supplement (doi:10.3390/foods11030457), 2022-02-03
Supplement: s1 [file s1]

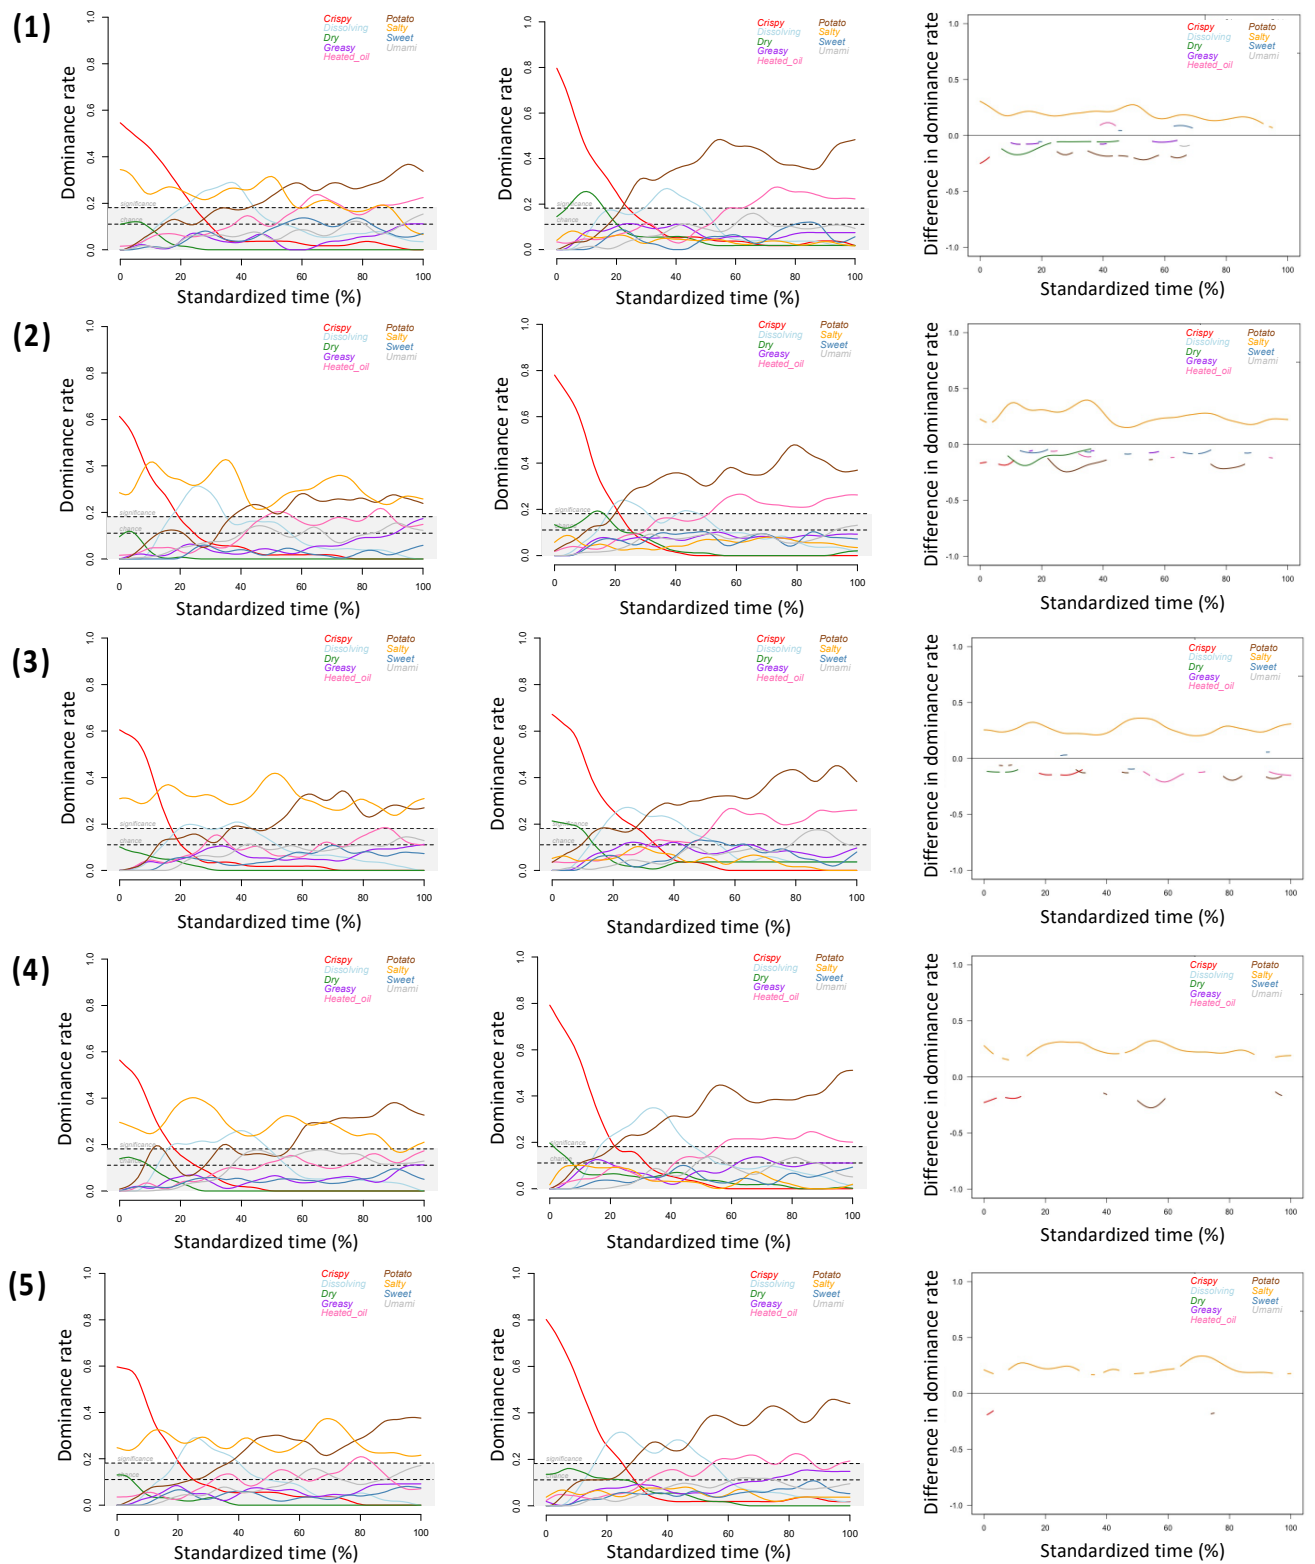

**Figure S1.** TDS profiles for regular (**left**) and sodium-reduced (**middle**) chips, and significant difference curves (**right**) of multiple intakes: bite 1 (1), bite 2 (2), bite 3 (3), bite 4 (4) and bite 5 (5) (n = 54).

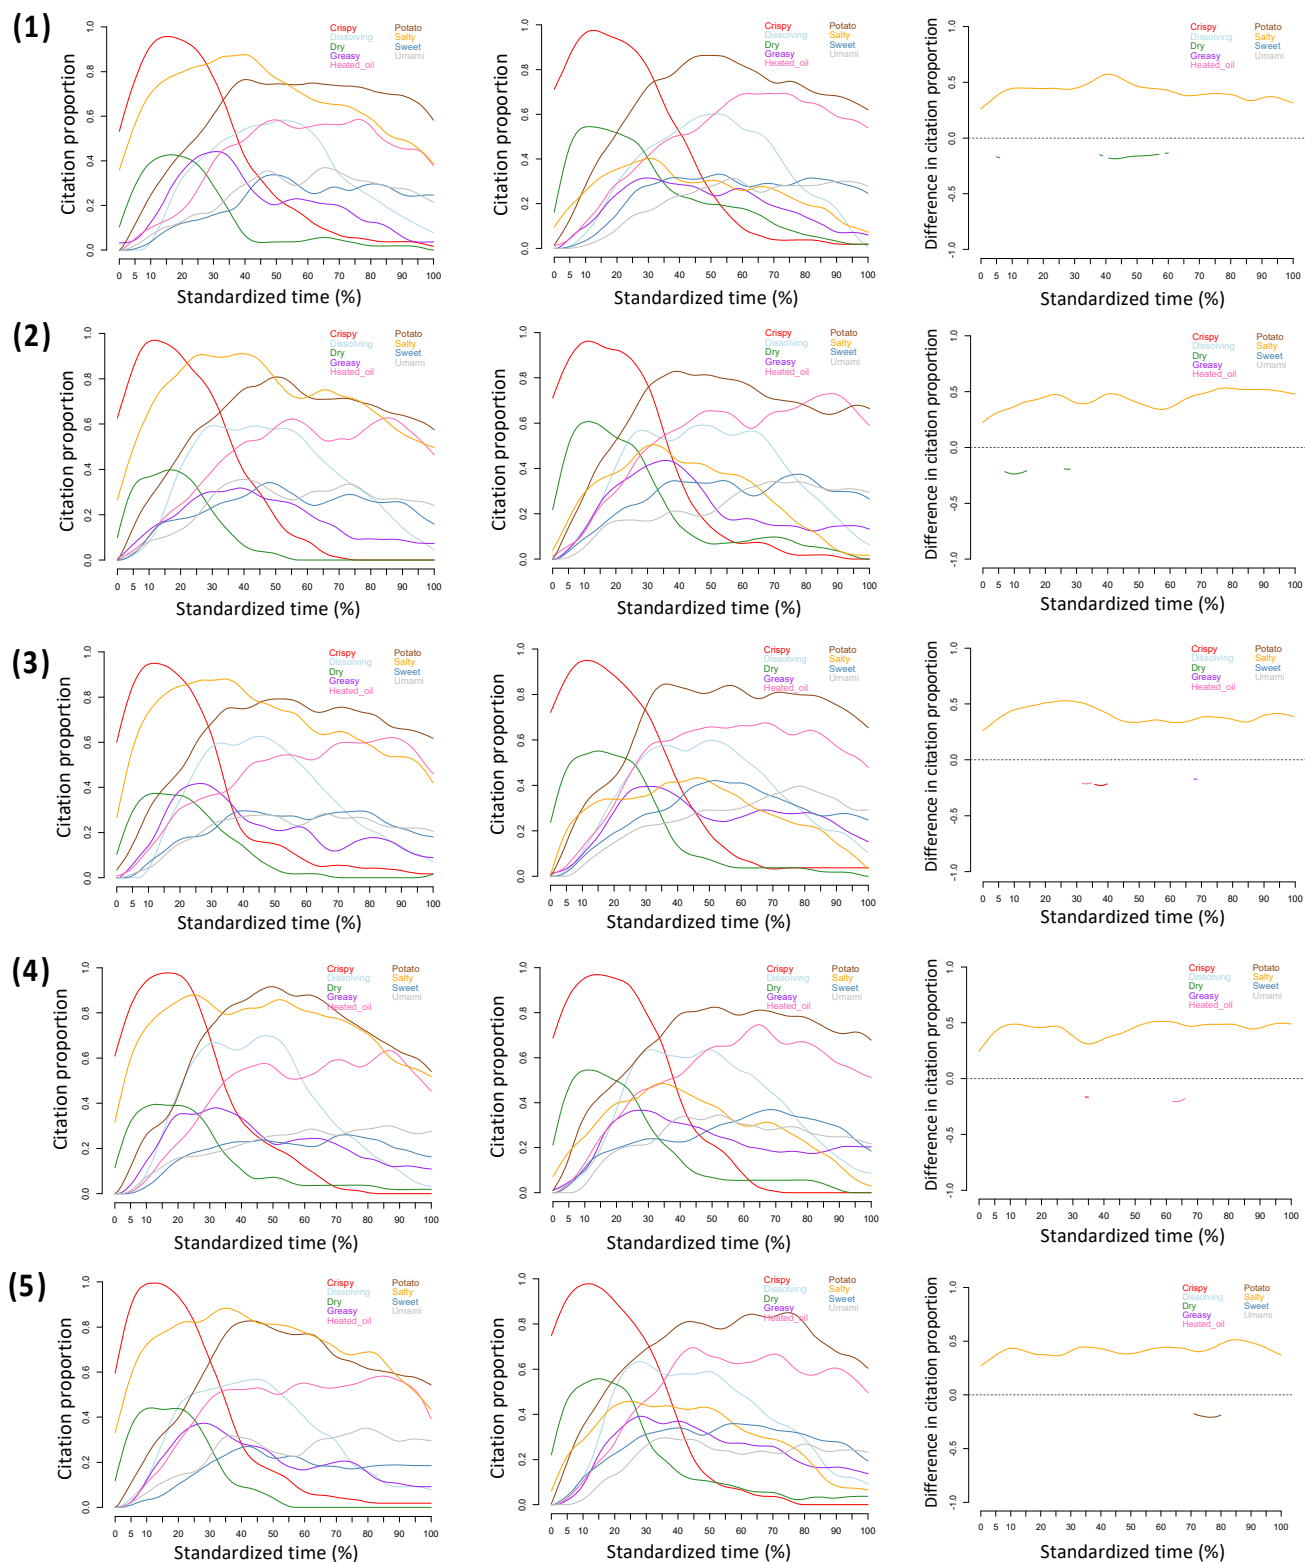

**Figure S2.** TCATA profiles for regular (**left**) and sodium-reduced (**middle**) chips, and significant difference curves (**right**) of multiple intakes: bite 1 (1), bite 2 (2), bite 3 (3), bite 4 (4) and bite 5 (5) (n = 54).

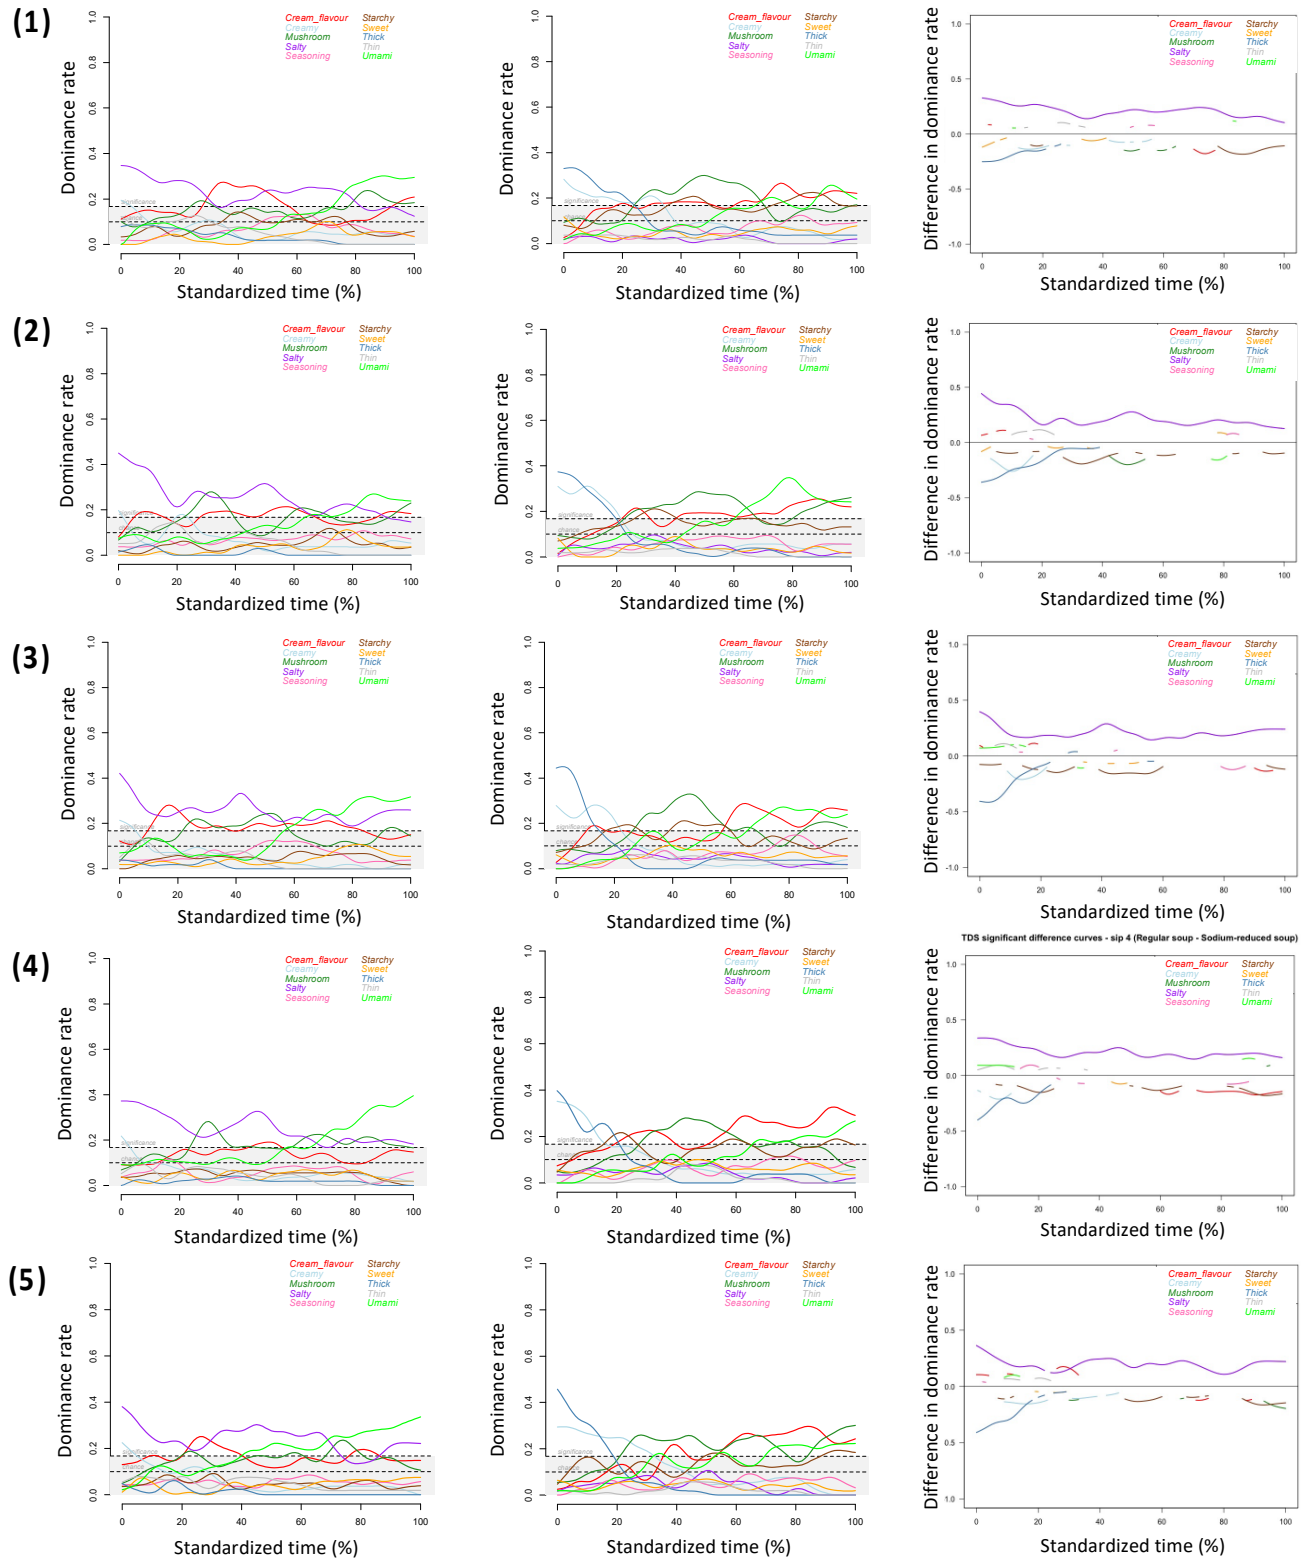

**Figure S3.** TDS profiles for regular (**left**) and sodium-reduced (**middle**) soup, and significant difference curves (**right**) of multiple intakes: sip 1 (1), sip 2 (2), sip 3 (3), sip 4 (4) and sip 5 (5) (n = 54).

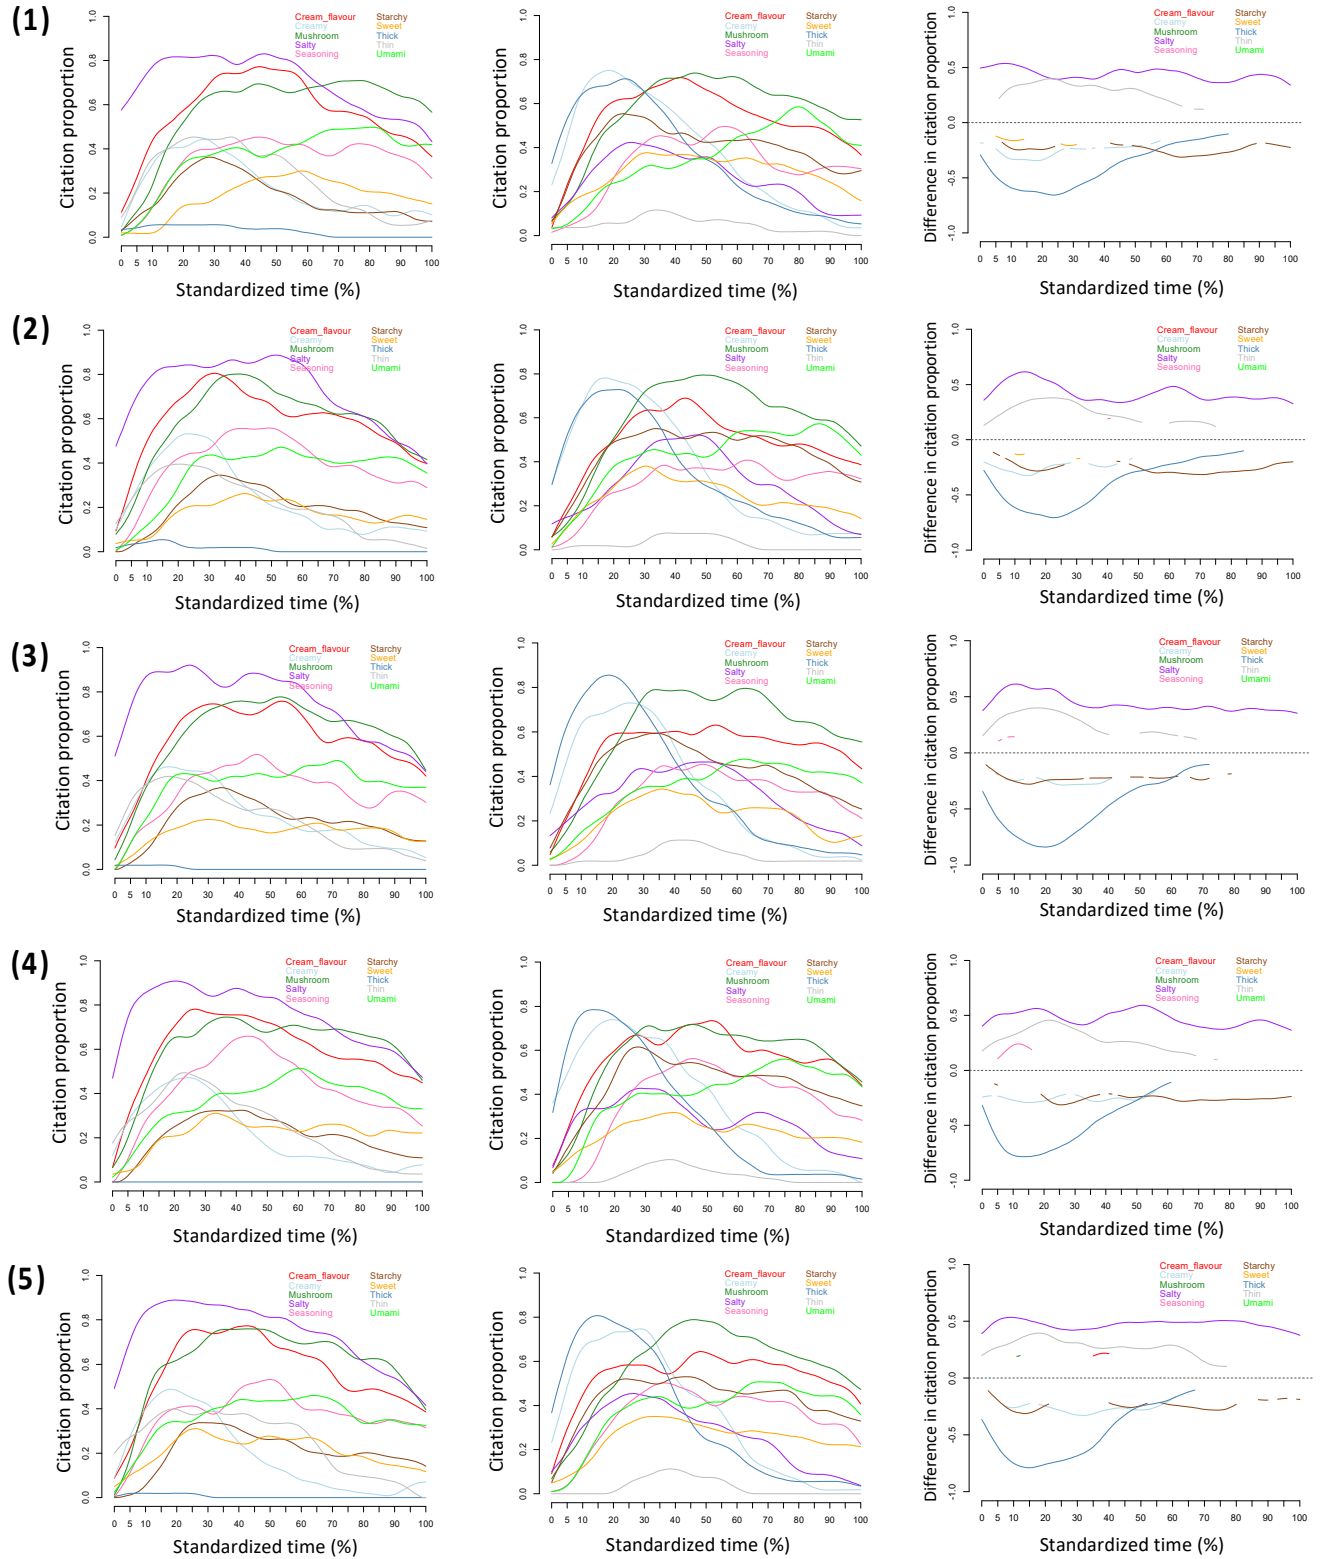

**Figure S4.** TCATA profiles for regular (**left**) and sodium-reduced (**middle**) soup, and significant difference curves (**right**) of multiple intakes: sip 1 (1), sip 2 (2), sip 3 (3), sip 4 (4) and sip 5 (5) (n = 54).
